# Supplementary material
Source: Springer Nature journal article supplement (https://www.springermedizin.de/resource/supplementary/13058_2011_2974_MOESM12_ESM.pdf/9702984)

Fold Difference Expression  
G allele vs. T allele

4  
3  
2  
1  
0

Wilcoxon rank sum test  
p-value = 0.04

Low-expression  
haplotypes  
(17)

High-expression  
haplotypes  
(25)

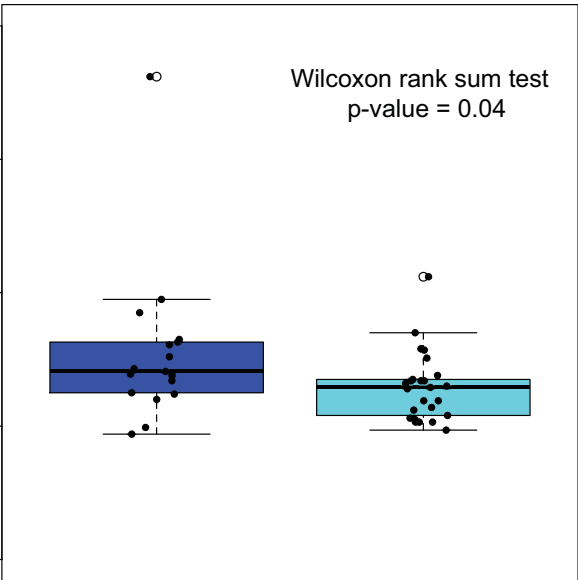

Supplement: MOESM12 [file 9702984]
